# Supplementary material for: Barriers to mental health help-seeking among young-adult medical students in Egypt: a cross-sectional study
Source: Research Square preprint supplement (doi:10.21203/rs.3.rs-2432283/v1), 2023-01-05
Supplement: Supplementary file 1 [file e459257c92ba0d7b50735ab1.docx]

| Table 9. Family attitude towards Mental health help seeking and familial suicidal attempts. | | |
| --- | --- | --- |
|  | Number of families have a member attempted suicide (Total n = 96) | p-value |
| The family know the importance of mental health helping and treatment | 53 (55.2%) | 0.745 |
| The family give mental health problems the same importance of physical health problems | 33 (34.4%) | 1.000 |
| The family supports you if you have a mental health problem | 68 (70%) | 0.046* |

* Statistically significant
