# Supplementary material for: Barriers to mental health help-seeking among young-adult medical students in Egypt: a cross-sectional study
Source: Research Square preprint supplement (doi:10.21203/rs.3.rs-2432283/v1), 2023-01-05
Supplement: Supplementary file 2 [file f45a1401bbfb079269bfc656.docx]

| Supplementary 2. Features of the participants who previously diagnosed with mental disorder. | | |
| --- | --- | --- |
| 1. Demographic features | | |
|  | Number of the participants who previously diagnosed with mental disorder. (Total = 243) | p- value |
| Sex (females) | 166 (68.3%) | 0.127 |
| Age | | |
| 18-19 | 40 (16.5%) | 0.030* |
| 20-21 | 114 (46.9%) |
| 22-23 | 70 (28.8%) |
| 24-25 | 19 (7.8%) |
| Order among the siblings | | |
| The youngest son | 51 (21%) | 0.002* |
| The middle son | 65 (26.7%) |
| The eldest son | 127 (52.3%) |
| Relationship status | | |
| Single | 233 (95.9%) | 0.542 |
| other | 10 (4.1%) |
| residence | | |
| Rural | 75 (30.9%) | 0.190 |
| urban | 168 (69.1%) |
| Educated in Al-azhar system (yes) | 31 (12.8%) | 0.291 |
| The academic year | | |
| 1st academic year | 29 (11.9%) | 0.945 |
| 2nd academic year | 76 (31.3%) |
| 3rd academic year | 38 (15.6%) |
| 4th academic year | 60 (24.7%) |
| 5th academic year | 33 (13.6%) |
| 6th academic year | 5 (2.1%) |
| intern | 2 (0.8%) |
| Grade achievement | | |
| Pass / GPA 1.00:1.6 | 21 (8.6%) | 0.041* |
| Good / GPA 1.7:2.6 | 39 (16%) |
| Very good / GPA 2.7:3.6 | 92 (37.9%) |
| Excellent / GPA 3.7:4.3 | 91 (37.4%) |
| Father's educational level | | |
| Uneducated | 3 (1.2%) | 0.182 |
| Primary school | 5 (2.1%) |
| Preparatory school | 10 (4.1%) |
| Secondary school | 42 (17.3%) |
| University degree | 183 (75.3%) |
| Mother's educational level | | |
| Uneducated | 9 (3.7%) | 0.758 |
| Primary school | 2 (0.8%) |
| Preparatory school | 9 (3.7%) |
| Secondary school | 49 (20.2%) |
| University degree | 174 (71.6%) |
| 1. Feature according to the Family attitudes | | |
| The family knows the importance of mental health helping and treatment | 123 (50.6%) | 0.022* |
| The family gives mental health problems the same importance of physical health problems | 67 (27.6%) | 0.013* |
| The family supports you if you have a mental health problem | 167 (68.7%) | <0.001* |
| The family with member attempted suicide | 29 (11.9%) | 0.102 |

* Statistically significant
